# Supplementary material for: Overexpression of BraLTP2, a Lipid Transfer Protein of Brassica napus, Results in Increased Trichome Density and Altered Concentration of Secondary Metabolites
Source: Int J Mol Sci. 2018 Jun 12;19(6):1733. doi: 10.3390/ijms19061733 (PMC6032385; doi:10.3390/ijms19061733)
Supplement: Supplementary file 1 [file ijms-19-01733-s001.zip]

Archive with 4 entries (4 files):
- ijms-308616-Figure S1.pdf
- Supplemental Table 1-.xlsx
- Supplemental Table 2-.xlsx
- Supplemental Table 3-.xlsx
