# Supplementary material for: Overexpression of BraLTP2, a Lipid Transfer Protein of Brassica napus, Results in Increased Trichome Density and Altered Concentration of Secondary Metabolites
Source: Int J Mol Sci. 2018 Jun 12;19(6):1733. doi: 10.3390/ijms19061733 (PMC6032385; doi:10.3390/ijms19061733)
Supplement: Supplementary file 1 [file ijms-19-01733-s001.zip › Supplemental Table 1-.xlsx]

## Sheet: Sheet1
Supplemental Table 1- The primer sequence of gene cloning and real-time PCR analysis.
Gene name	Primer name	Primer sequence
BraLTP2	BraLTP2-F	5'-GAGCTCGCATAACAGAAATGGCTTTGG-3'
BraLTP2	BraLTP2-R	5'-GGATCCCAACTGAGGAAAACAAAGATCACA-3'
ProBraLTP2	ProBraLTP2-F	5'-CTGCAGTGTAGATTTGAGATTGTGATTTGGAA-3'
ProBraLTP2	ProBraLTP2-R	5'-GGATCCCTTAACTATTTTACAAAATTATCTTGG-3'
BraLTP2 (35::BraLTP2::GFP)	BraLTP2::GFP-F	5'-AGT GAGCTCATGATGATGATGAGAGTAGC-3'
BraLTP2 (35::BraLTP2::GFP )	BraLTP2::GFP-R	5'-GCTGACCGTCTCACACAAGAGTTTGGTCAAAGGAATGG-3'
GFP (BraLTP2:GFP )	GFP-F	5'-TGCGTCCGTCTCTTGTGAGCAAGGGCGAGGAGCTGTTC-3'
GFP (BraLTP2:GFP )	GFP-R	5'-AGCGGATCCTTACTTGTACAGCTCGTCCATG-3'
BraLTP2 (Rt-PCR)	Rt-PCR-F	5'-GGTGTATGGAGTTTCTGA-3'
BraLTP2 (Rt-PCR)	Rt-PCR-R	5'-TGCTCAATCAATATCAAGTG-3'
BraLTP2 (Rt-PCR)	Rt-PCR-P	5'-TGAAGCAATCAAGCCAAGCGTT-3'
Actin	Actin-F	5'-ATGATGATGATGAGAGTAGC-3'
Actin	Actin-R	5'-GGATGGATATAGATCGTACC-3'
Actin	Actin-P	5'-ACTCACCACCACGAACCAGAA-3'
