# Supplementary material for: Overexpression of BraLTP2, a Lipid Transfer Protein of Brassica napus, Results in Increased Trichome Density and Altered Concentration of Secondary Metabolites
Source: Int J Mol Sci. 2018 Jun 12;19(6):1733. doi: 10.3390/ijms19061733 (PMC6032385; doi:10.3390/ijms19061733)
Supplement: Supplementary file 1 [file ijms-19-01733-s001.zip › Supplemental Table 2-.xlsx]

## Sheet: Sheet1
Supplemental Table 2- The all 494 metabolites have detected in WT and 35S::BraLTP2-3 plants leaves by LC-MS/MS.
Index	Class	WT1	WT2	WT3	35S::BraLTP2-3 rep 1	35S::BraLTP2-3 rep 2	35S::BraLTP2-3 rep 3	WT G	35S::BraLTP2-3 G	fold change	VIP
BCL0282	Tryptamines and its derivatives	506	2110	2060	156000	170000	169000	1560	165000	105.77	3.69
BCL0273	Indoles and its derivatives	223	1450	550	45000	38300	43600	741	42300	57.09	3.38
BCL0281	Flavonoids	512	911	397	34000	28200	32200	607	31500	51.87	3.35
BCL0212	Phenolamides	4220	7420	1880	294000	56500	184000	4510	178000	39.54	3.13
BCL0219	Carbohydrates	5510	14000	3350	118000	114000	124000	7620	119000	15.55	2.84
BCL0206	Others	699	1260	743	18900	3600	12100	901	11500	12.79	2.5
BCL0238	Vitamine related	6030	2060	5370	20200	50800	38500	4490	36500	8.13	2.38
BCL0226	Phenolamides	4030	2750	1340	28000	9440	20000	2710	19200	7.08	2.26
BCL0304	Phenylpropanoids	2610	826	4360	13200	16000	15400	2600	14900	5.72	2.24
BCL0485	Flavonol	4520	6780	19600	50500	58900	58400	10300	55900	5.43	2.22
BCL0145	unknown	55700	53700	30500	8040	7300	8040	46600	7790	0.17	2.22
BCL0256	Others	732000	702000	435000	2600000	3620000	3270000	623000	3160000	5.08	2.14
BCL0298	Others	136000	82800	139000	23100	21900	23900	119000	23000	0.19	2.13
BCL0184	Phenylpropanoids	15400	23000	9900	69200	85100	83900	16100	79400	4.93	2.13
BCL0157	unknown	193000	193000	122000	28900	38100	35300	169000	34100	0.2	2.11
BCL0318	Flavonoids	1850	1640	307	4380	9600	7120	1270	7030	5.56	2.11
BCL0317	Flavone	2260	1870	1930	12600	7130	10300	2020	10000	4.95	2.1
BCL0231	Others2	108000	26300	44700	365000	204000	305000	59700	291000	4.88	2.1
BCL0198	Others	261000	422000	616000	69000	96100	85000	433000	83400	0.19	2.09
BCL0275	Others	219000	196000	153000	995000	731000	904000	189000	877000	4.63	2.08
BCL0364	Phenylpropanoids	20900	17300	17500	73100	74000	77300	18600	74800	4.03	2
BCL0149	Phenolamides	27100	62500	75300	13000	8810	11800	55000	11200	0.2	2
BCL0306	Flavone	44700	36700	42900	204000	131000	175000	41400	170000	4.1	1.98
BCL0019	Amino acids	539000	73900	149000	49400	20400	36900	254000	35600	0.14	1.97
BCL0190	Anthocyanin	2320000	902000	1390000	7650000	4550000	6530000	1540000	6240000	4.06	1.96
BCL0255	Phenylpropanoids	1680000	1550000	1820000	429000	521000	502000	1680000	484000	0.29	1.89
BCL0036	Cholines	11100	6170	11200	35500	28700	36600	9490	33600	3.54	1.88
BCL0313	Flavonoids	7590	5700	3650	14500	26800	21100	5650	20800	3.68	1.87
BCL0293	Tryptamines and its derivatives	69900	26400	64600	203000	161000	192000	53600	185000	3.45	1.85
BCL0201	Phenolamides	629000	990000	965000	270000	219000	258000	861000	249000	0.29	1.84
BCL0314	Flavone	3430	2280	2280	11800	6540	9700	2660	9350	3.51	1.84
BCL0189	Phenolamides	2000	4010	56.3	4250	11400	8420	2020	8020	3.97	1.82
BCL0057	Tryptamines and its derivatives	10900	7080	19000	1570	4050	3940	12300	3190	0.26	1.82
BCL0305	Flavonol	10700	27400	21900	147000	32500	96500	20000	92000	4.6	1.81
BCL0242	Anthocyanin	6100	5060	3440	15300	13200	15300	4870	14600	3	1.76
BCL0267	Flavone	24000	18000	29100	92200	54100	76300	23700	74200	3.13	1.75
BCL0342	unknown	1840	4920	4270	11500	10300	11200	3680	11000	2.99	1.73
BCL0311	Phenylpropanoids	7010000	11500000	10800000	2600000	3740000	3310000	9770000	3220000	0.33	1.73
BCL0171	Amino acid derivatives	39500	20000	19100	58600	97100	83900	26200	79900	3.05	1.73
BCL0323	Flavonoids	18600	20900	13500	52200	47400	51200	17700	50300	2.84	1.72
BCL0308	Flavone	6960	4600	4500	13500	16800	15800	5350	15400	2.87	1.72
BCL0191	Anthocyanin	90700	42700	32200	206000	115000	173000	55200	165000	2.98	1.69
BCL0228	Cholines	2520000	2510000	1390000	728000	684000	772000	2140000	728000	0.34	1.67
BCL0349	unknown	561000	816000	758000	234000	301000	274000	712000	270000	0.38	1.63
BCL0074	Tryptamines and its derivatives	112000	50400	80000	30600	23300	30000	80800	28000	0.35	1.62
BCL0279	Coumarins and its derivatives	3330	7280	16600	2970	1600	2510	9070	2360	0.26	1.6
BCL0489	Phytohormones	1450000	2260000	949000	2860000	5460000	4520000	1550000	4280000	2.76	1.6
BCL0297	Flavone	3630	3130	5160	13200	7870	10200	3970	10400	2.62	1.59
BCL0131	Nucleotide and its derivates	39300	23300	22000	72200	70400	65500	28200	69400	2.46	1.58
BCL0296	Organic acid and its derivatives	147000	96000	35700	155000	360000	273000	92900	263000	2.83	1.57
BCL0244	Nucleotide and its derivates	357000	330000	372000	126000	170000	151000	353000	149000	0.42	1.56
BCL0321	Indoles and its derivatives	8250	3360	10700	19000	18000	18800	7440	18600	2.5	1.56
BCL0357	unknown	10400	20600	11300	6760	3980	5310	14100	5350	0.38	1.54
BCL0410	Others	5920	4730	3760	10000	12200	11400	4800	11200	2.33	1.53
BCL0391	unknown	4940	3880	6800	17800	8700	13900	5210	13500	2.58	1.53
BCL0261	Anthocyanin	5230	2260	2700	10600	6000	8880	3400	8490	2.5	1.52
BCL0335	Coumarins and its derivatives	15600	11900	17300	40800	28700	35800	14900	35100	2.35	1.52
BCL0029	Cholines	652000	1350000	694000	1730000	2530000	2240000	899000	2170000	2.41	1.52
BCL0326	Alkaloids	1850000	4110000	1260000	843000	707000	832000	2410000	794000	0.33	1.52
BCL0266	Phenylpropanoids	594	3150	2270	4290	5370	5000	2000	4890	2.44	1.52
BCL0177	Flavone	9960000	3810000	3360000	15100000	11200000	14400000	5710000	13600000	2.38	1.51
BCL0449	unknown	702	691	1040	2470	1360	2130	811	1990	2.45	1.5
BCL0280	Phenolamides	101000	81800	118000	48400	37100	45300	100000	43600	0.43	1.5
BCL0142	unknown	3310	4820	5960	12800	9620	10200	4700	10900	2.32	1.5
BCL0315	Phenylpropanoids	3770	5090	4840	14400	7710	11300	4570	11100	2.44	1.5
BCL0268	Flavonol	11000	11200	8030	35500	15400	26900	10100	25900	2.57	1.49
BCL0197	Phenolamides	17100	30300	13400	5220	9840	8310	20300	7790	0.38	1.49
BCL0225	Phenylpropanoids	6540000	7590000	5410000	11900000	17500000	15000000	6510000	14800000	2.27	1.48
BCL0026	Amino acids	40600000	15700000	20400000	6190000	12500000	9740000	25600000	9480000	0.37	1.48
BCL0354	Others	37600	60100	37100	17900	19700	20900	44900	19500	0.43	1.47
BCL0172	Others	6610000	6640000	6310000	3750000	2090000	3090000	6520000	2980000	0.46	1.47
BCL0463	Lipids-glycerophospholipid	230000	272000	302000	112000	144000	121000	268000	126000	0.47	1.45
BCL0252	Vitamine related	13400	11200	9320	19400	29500	25700	11300	24900	2.2	1.44
BCL0088	unknown	101000	71700	62600	123000	217000	194000	78400	178000	2.27	1.43
BCL0159	unknown	3030	2610	1670	5320	4700	5340	2440	5120	2.1	1.41
BCL0486	Phytohormones	4790	3640	2260	17200	3720	11900	3560	10900	3.07	1.41
BCL0167	Terpenoids	86100	93900	72800	38900	42800	42800	84300	41500	0.49	1.4
BCL0076	Organic acid and its derivatives	538000	364000	276000	185000	167000	182000	393000	178000	0.45	1.39
BCL0162	Vitamine related	531000	2040000	2060000	619000	415000	557000	1540000	530000	0.34	1.36
BCL0108	Amino acid derivatives	479000	523000	388000	906000	845000	931000	463000	894000	1.93	1.35
BCL0345	Tryptamines and its derivatives	20800	20600	17300	13200	5660	10100	19600	9650	0.49	1.35
BCL0229	Phenolamides	122000	68600	74700	146000	221000	171000	88400	179000	2.03	1.34
BCL0332	Phytohormones	28000	38200	35600	64000	62900	65100	33900	64000	1.89	1.33
BCL0384	Terpenoids	3550	6080	10500	23100	7830	17100	6710	16000	2.39	1.32
BCL0170	Phenolamides	47500	122000	175000	55600	31600	44900	115000	44000	0.38	1.32
BCL0018	Amino acids	737000	4430000	306000	2050000	3940000	3160000	1820000	3050000	1.67	1.31
BCL0401	unknown	1730000	2300000	1800000	772000	1190000	1060000	1940000	1010000	0.52	1.31
BCL0265	Phenolamides	13600	11000	8860	25500	16900	22900	11200	21800	1.95	1.31
BCL0394	Lipids-glycerophospholipid	12900	14300	10700	6930	6290	7100	12600	6770	0.54	1.3
BCL0387	Lipids-glycerophospholipid	53700	75800	46100	23300	34600	30700	58500	29500	0.5	1.3
BCL0331	Alkaloids	32500	102000	21600	19000	14300	19900	52000	17700	0.34	1.29
BCL0099	Amino acids	899000	493000	482000	108000	474000	307000	625000	296000	0.47	1.29
BCL0224	Flavone	44800	48100	42100	62000	113000	94200	45000	89700	1.99	1.29
BCL0154	Nucleotide and its derivates	49900	35100	55900	76600	96400	90700	47000	87900	1.87	1.29
BCL0199	Phenolamides	5920	3960	11300	1490	4450	3270	7060	3070	0.44	1.28
BCL0118	unknown	17100	15000	14800	25500	29700	29200	15600	28100	1.8	1.28
BCL0295	Flavonoids	18500	16900	3910	19800	32100	26600	13100	26200	2	1.27
BCL0192	Organic acid and its derivatives	16600	12000	13700	5490	9430	7660	14100	7530	0.53	1.27
BCL0355	unknown	36600	43200	34300	23400	18300	21700	38000	21100	0.56	1.27
BCL0316	Indoles and its derivatives	2460	2040	26600	21100	9600	15700	10400	15500	1.49	1.27
BCL0110	Amino acid derivatives	86000	71600	48400	149000	107000	131000	68700	129000	1.88	1.27
BCL0027	Amino acids	9380000	3660000	6260000	3250000	2600000	3080000	6430000	2980000	0.46	1.26
BCL0221	Phenolamides	9780	6610	3450	2300	3550	3010	6610	2950	0.45	1.25
BCL0388	unknown	64800	149000	230000	495000	155000	371000	148000	340000	2.3	1.25
BCL0083	Carbohydrates	226000	254000	165000	333000	411000	427000	215000	390000	1.81	1.25
BCL0338	Flavonol	39900	30700	34200	8570	27600	19100	34900	18400	0.53	1.25
BCL0164	Others	707000	3290000	2210000	882000	620000	806000	2070000	769000	0.37	1.24
BCL0220	Phenylpropanoids	9740000	11700000	5900000	16000000	16700000	16700000	9110000	16500000	1.81	1.23
BCL0193	Phenolamides	14700000	20400000	24100000	11100000	10200000	10900000	19700000	10700000	0.54	1.23
BCL0276	Indoles and its derivatives	25900	43500	37100	14000	22400	20200	35500	18900	0.53	1.23
BCL0165	Phytohormones	15100	24200	33600	1650	25600	13900	24300	13700	0.56	1.22
BCL0239	Phytohormones	2620	1150	4330	4340	5540	5040	2700	4970	1.84	1.22
BCL0292	Flavonol	13100	2090	903	2000	24700	14100	5360	13600	2.54	1.2
BCL0341	unknown	37500	35400	23800	8160	24800	18200	32200	17100	0.53	1.2
BCL0059	Vitamine related	8180000	11800000	5520000	3000000	5370000	4550000	8500000	4310000	0.51	1.2
BCL0235	Coumarins and its derivatives	140000	146000	116000	216000	231000	228000	134000	225000	1.68	1.2
BCL0464	Lipids-glycerophospholipid	5400	5860	7780	3560	3900	3450	6350	3640	0.57	1.2
BCL0111	Phenolamides	7140	6310	9860	4610	4050	4520	7770	4390	0.57	1.19
BCL0371	unknown	1850	3020	8240	12500	4420	9580	4370	8830	2.02	1.19
BCL0406	unknown	289000	375000	327000	161000	219000	203000	330000	194000	0.59	1.18
BCL0451	Lipids-glycerophospholipid	7170	7830	6730	3350	5040	4500	7240	4300	0.59	1.18
BCL0249	Phenylpropanoids	27800	2800	20900	27400	29900	29200	17200	28800	1.68	1.17
BCL0223	Phenolamides	46700	110000	22100	27700	17500	24000	59600	23100	0.39	1.17
BCL0307	Nucleotide and its derivates	128000	502000	240000	358000	698000	561000	290000	539000	1.86	1.16
BCL0390	unknown	3330	2540	2630	1430	1830	1810	2830	1690	0.6	1.16
BCL0327	Flavone	115000	110000	105000	167000	184000	179000	110000	177000	1.61	1.16
BCL0128	unknown	55500	60100	55600	90700	88700	93600	57100	91000	1.59	1.15
BCL0400	unknown	1580	2420	3660	7610	2590	5670	2550	5290	2.07	1.14
BCL0066	Vitamine related	27800	26400	54600	17400	18500	21800	36300	19200	0.53	1.13
BCL0161	Nucleotide and its derivates	522000	518000	538000	318000	341000	348000	526000	336000	0.64	1.13
BCL0144	unknown	11100	8640	12700	8840	3530	6290	10800	6220	0.58	1.13
BCL0348	unknown	6890	11200	5450	13900	11600	13900	7850	13100	1.67	1.12
BCL0035	Amino acid derivatives	727000	1220000	590000	807000	2800000	1850000	846000	1820000	2.15	1.12
BCL0478	unknown	7250	8710	9340	11600	15400	14100	8430	13700	1.62	1.12
BCL0048	Others	3310	1480	6140	7930	4650	6600	3640	6390	1.76	1.12
BCL0386	Others	10600	11400	9650	18200	14500	17100	10600	16600	1.57	1.1
BCL0096	Others	39900	40100	33600	46400	76100	68700	37900	63700	1.68	1.1
BCL0230	Catechin derivatives	44900	10800	9680	3200	15300	8440	21800	8980	0.41	1.1
BCL0049	Tryptamines and its derivatives	142000	43900	43200	21500	45800	34800	76400	34000	0.45	1.09
BCL0473	Others	58400	52600	47100	81500	79100	82200	52700	80900	1.54	1.09
BCL0407	unknown	21600	25100	21000	10300	17000	14800	22600	14000	0.62	1.09
BCL0146	unknown	25100	34600	41400	23000	17200	20600	33700	20300	0.6	1.08
BCL0271	Flavone	15000	13200	21000	11400	7890	10300	16400	9870	0.6	1.08
BCL0194	Indoles and its derivatives	16200	26100	13500	11500	9540	11300	18600	10800	0.58	1.07
BCL0178	Phenolamides	79100	442000	425000	171000	70900	125000	315000	122000	0.39	1.07
BCL0350	Others	7740	8480	4060	14800	7900	12300	6760	11700	1.73	1.06
BCL0047	Others	6600	5800	10300	17600	8670	13400	7570	13200	1.75	1.06
BCL0263	Flavonol	2330	4930	2910	4050	7400	5940	3390	5800	1.71	1.06
BCL0234	Coumarins and its derivatives	32500	21600	33400	33200	67000	51200	29200	50500	1.73	1.05
BCL0181	Cholines	52300	130000	175000	69300	46500	58900	119000	58200	0.49	1.05
BCL0347	Flavonoids	14200	3980	1780	9970	8870	10200	6650	9680	1.46	1.04
BCL0408	Lipids-glycerophospholipid	96300	143000	139000	62100	90700	83500	126000	78800	0.62	1.04
BCL0071	Nucleotide and its derivates	114000	69400	80800	161000	113000	141000	88100	138000	1.57	1.02
BCL0372	unknown	20700	25100	15400	8330	16300	13000	20400	12600	0.62	1.02
BCL0469	Lipids-glycerophospholipid	3370	3630	5320	2460	2630	2770	4110	2620	0.64	1.01
BCL0182	Phytohormones	12200	9340	3360	4530	3550	4150	8300	4080	0.49	1
BCL0139	unknown	817	19300	10500	21500	7110	14900	10200	14500	1.42	1
BCL0333	Flavone	9730	4970	14500	5700	4670	5300	9730	5220	0.54	1
BCL0185	Indoles and its derivatives	25900	21400	23000	17300	13000	17500	23400	15900	0.68	0.99
BCL0040	Amino acid derivatives	18300	7180	7540	4230	7250	6280	11000	5920	0.54	0.99
BCL0116	Others	5880000	3700000	3510000	2400000	3020000	2840000	4360000	2750000	0.63	0.99
BCL0274	Cholines	5010	8040	16000	7020	3010	5320	9680	5120	0.53	0.98
BCL0322	Amino acid derivatives	2850	10700	17700	15000	15600	16100	10400	15600	1.49	0.98
BCL0070	Organic acid and its derivatives	24900	19700	26000	75400	18400	49700	23500	47800	2.03	0.95
BCL0440	Lipids-glycerophospholipid	1100000	954000	1330000	688000	818000	826000	1130000	777000	0.69	0.95
BCL0046	Others	9440	13600	12300	13800	20800	17800	11800	17500	1.48	0.93
BCL0330	Phenylpropanoids	10300	14000	12000	15500	17200	18100	12100	16900	1.4	0.92
BCL0424	Lipids-fatty acid	68800	65200	48800	77100	81100	106000	60900	88000	1.44	0.91
BCL0085	Amino acids	4160000	2950000	4270000	4690000	6070000	5480000	3790000	5410000	1.43	0.91
BCL0336	Flavonoids	23900	50500	49900	45500	81700	65700	41400	64300	1.55	0.91
BCL0310	Terpenoids	1700	6770	4130	1480	23400	12800	4200	12600	2.99	0.9
BCL0109	Nucleotide and its derivates	205000	322000	340000	368000	444000	428000	289000	413000	1.43	0.9
BCL0106	Tryptamines and its derivatives	45000	38600	53100	61300	66700	60200	45600	62700	1.38	0.9
BCL0441	unknown	59200	62200	67700	42900	48900	48200	63000	46700	0.74	0.9
BCL0187	Phenylpropanoids	78900	99500	93400	134000	111000	128000	90600	124000	1.37	0.89
BCL0079	Others	230000	184000	200000	247000	314000	286000	205000	282000	1.38	0.89
BCL0163	Amino acid derivatives	42000	42200	56900	37700	28000	33900	47000	33200	0.71	0.89
BCL0117	Carbohydrates	134000	87200	118000	63200	90400	81100	113000	78200	0.69	0.88
BCL0437	unknown	69700	46900	42000	27200	42400	37300	52900	35600	0.67	0.88
BCL0183	Amino acids	17100000	13000000	9150000	7290000	9550000	9220000	13100000	8690000	0.66	0.87
BCL0186	Indoles and its derivatives	134000	94300	77700	58500	76600	72100	102000	69100	0.68	0.87
BCL0031	Vitamine related	61800	44500	24400	44200	83900	73100	43600	67100	1.54	0.87
BCL0095	Others	275000	551000	478000	562000	646000	653000	435000	620000	1.43	0.87
BCL0132	Vitamine related	62700	42300	63200	48000	27200	39600	56100	38300	0.68	0.87
BCL0380	unknown	326000	308000	281000	470000	357000	423000	305000	417000	1.37	0.87
BCL0087	unknown	20000	14200	7300	17300	21600	20800	13800	19900	1.44	0.86
BCL0368	unknown	69200	60700	115000	111000	111000	120000	81600	114000	1.4	0.86
BCL0456	Lipids-glycerophospholipid	17600	18000	18300	11500	16000	12500	18000	13300	0.74	0.86
BCL0373	Others	270000	227000	216000	183000	157000	189000	238000	176000	0.74	0.86
BCL0021	Vitamine related	9130	44900	3350	3360	95400	51100	19100	50000	2.61	0.86
BCL0430	Lipids-glycerophospholipid	1800000	2270000	2160000	1250000	1700000	1600000	2080000	1520000	0.73	0.85
BCL0120	Vitamine related	7040	5370	9280	8940	10700	10400	7230	10000	1.39	0.85
BCL0203	Tryptamines and its derivatives	32400	23100	20500	32200	35400	36300	25300	34600	1.37	0.85
BCL0202	Others	35000	20600	22800	30500	41200	38500	26100	36700	1.41	0.85
BCL0073	Others	46500	45700	56600	59500	71000	68000	49600	66200	1.33	0.85
BCL0421	unknown	8360	3530	5880	11000	6510	8680	5920	8730	1.47	0.85
BCL0023	Amino acids	18000	26900	18800	25200	33100	29800	21200	29400	1.38	0.85
BCL0396	Others	25800	19200	39800	34000	43500	41800	28300	39800	1.41	0.85
BCL0233	Flavonoids	15600	10400	20700	11900	7940	11100	15600	10300	0.66	0.84
BCL0397	Terpenoids	54500	34500	27800	26300	23800	27900	38900	26000	0.67	0.84
BCL0444	Lipids-glycerophospholipid	45200	45900	48800	60300	56400	64000	46600	60200	1.29	0.83
BCL0091	Phenylpropanoids	820	5060	8940	7150	4690	7070	4940	6300	1.28	0.83
BCL0064	Others2	158000	121000	253000	249000	233000	252000	177000	245000	1.38	0.83
BCL0236	Phenylpropanoids	13800000	15000000	12600000	14700000	23900000	19700000	13800000	19400000	1.41	0.83
BCL0329	Others	123000	129000	107000	153000	154000	157000	120000	155000	1.29	0.83
BCL0257	Catechin derivatives	259000	47500	24600	21100	53800	41500	110000	38800	0.35	0.82
BCL0414	Others	2270	3680	4470	5450	4100	5000	3470	4850	1.4	0.82
BCL0058	Carbohydrates	11600	2630	9040	7700	13800	11700	7760	11100	1.43	0.82
BCL0063	Others	344000	240000	279000	223000	194000	220000	288000	212000	0.74	0.82
BCL0093	Nucleotide and its derivates	196000	117000	132000	62100	145000	99900	148000	102000	0.69	0.82
BCL0248	Amino acids	9760	8910	12500	14200	13000	13900	10400	13700	1.32	0.82
BCL0375	unknown	814000	668000	562000	518000	463000	532000	681000	504000	0.74	0.81
BCL0092	Nucleotide and its derivates	8000	12500	9030	9400	19100	15500	9840	14700	1.49	0.81
BCL0379	Others	335000	268000	323000	460000	352000	416000	309000	409000	1.33	0.8
BCL0479	unknown	35200	119000	86600	110000	105000	117000	80300	111000	1.38	0.8
BCL0475	unknown	44700	49800	30000	26700	31000	31000	41500	29600	0.71	0.8
BCL0477	unknown	6530	4820	3570	5670	7850	7040	4970	6850	1.38	0.8
BCL0402	Lipids-fatty acid	1350000	1430000	1240000	2910000	1060000	2640000	1340000	2200000	1.64	0.8
BCL0404	Lipids-glycerophospholipid	15000	19900	16700	10900	14400	13400	17200	12900	0.75	0.8
BCL0169	Nucleotide and its derivates	3670000	2570000	2500000	3300000	4410000	4080000	2910000	3930000	1.35	0.8
BCL0072	Nucleotide and its derivates	18200	13900	6200	28900	10400	20700	12800	20000	1.57	0.79
BCL0369	unknown	25300	31200	18800	11100	24100	17900	25100	17700	0.7	0.79
BCL0399	Coumarins and its derivatives	18200	30800	19600	51300	16900	46400	22900	38200	1.67	0.79
BCL0122	unknown	8980	8670	8680	9740	13000	11600	8780	11400	1.3	0.79
BCL0138	unknown	37600	35600	50300	36000	24200	30700	41200	30300	0.74	0.79
BCL0043	Cholines	17900	21600	26900	20100	11500	16500	22100	16000	0.72	0.78
BCL0075	Organic acid and its derivatives	22000000	28200000	15600000	27200000	30700000	30100000	21900000	29300000	1.34	0.78
BCL0207	Others	1240000	3330000	1780000	1570000	5110000	3680000	2120000	3450000	1.63	0.78
BCL0114	Others	1080000	709000	993000	573000	770000	699000	927000	681000	0.73	0.78
BCL0222	Phenylpropanoids	12500000	12200000	6070000	11500000	16000000	15000000	10300000	14200000	1.38	0.78
BCL0460	Lipids-glycerophospholipid	5840	9540	10600	5810	6610	5890	8660	6100	0.7	0.77
BCL0121	Amino acids	61100000	58500000	59700000	51200000	43800000	48500000	59800000	47800000	0.8	0.77
BCL0102	Vitamine related	574000	749000	776000	717000	1170000	1000000	700000	962000	1.38	0.77
BCL0125	unknown	32300	24900	30500	21900	22700	23600	29200	22700	0.78	0.77
BCL0445	unknown	3340	3280	4180	1870	3390	2790	3600	2680	0.75	0.77
BCL0301	Flavonoids	16100	4810	2210	3430	21700	13100	7710	12700	1.65	0.76
BCL0133	Vitamine related	20300	15800	12700	21600	19900	21900	16300	21100	1.3	0.75
BCL0101	Phenylpropanoids	29800	41300	52500	50600	54800	56300	41200	53900	1.31	0.75
BCL0041	Cholines	64100	39300	28900	103000	34300	70600	44100	69300	1.57	0.75
BCL0448	Lipids-fatty acid	191000	226000	102000	106000	118000	128000	173000	117000	0.68	0.74
BCL0480	unknown	11900	11500	15900	14000	19400	18000	13100	17100	1.31	0.74
BCL0214	Phenylpropanoids	2410	10700	8390	6940	12200	9760	7170	9630	1.34	0.73
BCL0097	Alkaloids	1750000	1790000	1740000	1110000	1630000	1440000	1760000	1390000	0.79	0.72
BCL0438	Lipids-glycerophospholipid	2490000	3180000	3240000	1890000	2610000	2430000	2970000	2310000	0.78	0.71
BCL0426	Lipids-fatty acid	117000	151000	118000	141000	160000	197000	129000	166000	1.29	0.71
BCL0442	Alkaloids	16200	19100	12300	21600	17700	21600	15900	20300	1.28	0.71
BCL0241	Organic acid and its derivatives	282000	180000	261000	185000	169000	194000	241000	183000	0.76	0.71
BCL0227	Others	265000	78500	124000	99300	80700	104000	156000	94700	0.61	0.7
BCL0253	Catechin derivatives	108000	32000	20900	14200	44700	27900	53600	28900	0.54	0.7
BCL0065	Alkaloids	56100	32200	39000	34700	25500	33700	42400	31300	0.74	0.7
BCL0325	Flavone	4400	5370	3710	7480	4340	6290	4490	6040	1.34	0.7
BCL0409	Others2	894	1310	729	2360	704	1570	978	1550	1.58	0.69
BCL0052	Organic acid and its derivatives	42100	13900	44200	86600	19900	58500	33400	55000	1.65	0.69
BCL0482	unknown	24800	18300	16500	22800	25300	27000	19900	25000	1.26	0.69
BCL0104	Amino acid derivatives	9870000	17900000	8920000	15200000	15800000	15800000	12200000	15600000	1.27	0.69
BCL0090	unknown	558000	520000	591000	651000	650000	692000	556000	664000	1.19	0.68
BCL0459	unknown	41400	35600	33700	24700	34200	30100	36900	29700	0.8	0.67
BCL0254	Phenylpropanoids	18500	11800	13500	9710	12400	11700	14600	11300	0.77	0.67
BCL0488	Phytohormones	3350000	9030000	5160000	4920000	10900000	8380000	5850000	8070000	1.38	0.66
BCL0465	unknown	51400	75100	82100	98200	15700	59100	69500	57700	0.83	0.66
BCL0457	unknown	1410000	1290000	1350000	1210000	1020000	1160000	1350000	1130000	0.84	0.66
BCL0126	Others	32600	31800	41200	35500	19300	28100	35200	27600	0.79	0.66
BCL0032	Amino acids	817000	736000	981000	1050000	974000	1050000	845000	1020000	1.21	0.66
BCL0168	Amino acid derivatives	103000	144000	191000	143000	74200	111000	146000	109000	0.75	0.64
BCL0290	Flavonoids	20700	12400	17700	21400	19600	21800	16900	20900	1.24	0.63
BCL0038	Others2	16300	16900	15400	9560	16200	13700	16200	13100	0.81	0.63
BCL0175	Others	50600	22300	22300	11700	32100	23900	31700	22600	0.71	0.62
BCL0218	Organic acid and its derivatives	10500	7120	6900	8030	12700	10600	8170	10400	1.28	0.62
BCL0383	Terpenoids	12600	10900	12100	12900	14200	15000	11900	14000	1.18	0.62
BCL0434	unknown	5080	7320	8310	4410	6010	5710	6900	5380	0.78	0.62
BCL0487	Phytohormones	7220000	19100000	10300000	9840000	22400000	17300000	12200000	16500000	1.35	0.62
BCL0432	unknown	11400	13700	27700	23900	18800	22900	17600	21900	1.24	0.62
BCL0466	Others	2500	3060	3090	3190	3580	3500	2880	3420	1.19	0.61
BCL0068	Others	81800	65300	43400	78300	75100	81100	63500	78200	1.23	0.61
BCL0148	Amino acids	204000	278000	115000	443000	136000	294000	199000	291000	1.46	0.61
BCL0067	Amino acids	19800	19200	16300	28400	16800	25500	18400	23600	1.28	0.6
BCL0100	Phenylpropanoids	69600	120000	72400	95700	103000	125000	87300	108000	1.24	0.6
BCL0435	Lipids-glycerophospholipid	270000	324000	369000	206000	302000	274000	321000	261000	0.81	0.6
BCL0153	unknown	22900	36800	34800	38500	37300	38900	31500	38200	1.21	0.6
BCL0089	unknown	76200	49700	60700	63800	86200	79300	62200	76400	1.23	0.6
BCL0467	unknown	230000	262000	309000	300000	322000	326000	267000	316000	1.18	0.6
BCL0398	unknown	895000	1260000	892000	1930000	713000	1740000	1020000	1460000	1.44	0.59
BCL0134	Amino acid derivatives	53700	33000	38900	32500	32700	34900	41900	33400	0.8	0.59
BCL0179	Vitamine	109000	195000	156000	236000	144000	201000	153000	194000	1.26	0.58
BCL0294	Flavone	40200	8940	6670	11000	31300	22300	18600	21500	1.16	0.57
BCL0127	Nucleotide and its derivates	328000	304000	166000	458000	224000	352000	266000	345000	1.3	0.56
BCL0392	unknown	7140	7860	6380	6850	4410	6590	7130	5950	0.84	0.56
BCL0123	Amino acid derivatives	78700	66100	93800	115000	77000	100000	79500	97400	1.22	0.56
BCL0136	unknown	109000	72400	95800	69800	78100	80400	92400	76100	0.82	0.55
BCL0362	Lipids-glycerides	5680000	4970000	6700000	6000000	7270000	7150000	5780000	6810000	1.18	0.55
BCL0339	Alkaloids	6570	11000	10700	12200	2900	8690	9420	7930	0.84	0.55
BCL0050	Tryptamines and its derivatives	329000	163000	254000	192000	187000	196000	249000	192000	0.77	0.55
BCL0366	unknown	4360000	3560000	4830000	4510000	5170000	5230000	4250000	4970000	1.17	0.54
BCL0208	Phytohormones	2190	3630	5660	4410	4550	4690	3830	4550	1.19	0.54
BCL0474	Others	28700	42800	21700	35000	36800	39000	31100	36900	1.19	0.54
BCL0458	unknown	7530	7950	5800	5400	6300	6230	7090	5980	0.84	0.53
BCL0017	Nucleotide and its derivates	10400	54400	95.4	976	46800	38700	21600	28800	1.33	0.53
BCL0080	Others	542000	341000	276000	327000	247000	328000	386000	301000	0.78	0.53
BCL0476	Lipids-fatty acid	6010	4460	4290	5250	5910	6120	4920	5760	1.17	0.53
BCL0147	unknown	2520000	2930000	1340000	4790000	1450000	3290000	2260000	3180000	1.4	0.53
BCL0277	Flavonol	42400	15700	9190	8330	61700	37400	22400	35800	1.6	0.53
BCL0443	Lipids-fatty acid	139000	198000	111000	205000	143000	192000	149000	180000	1.21	0.52
BCL0196	Nucleotide and its derivates	310000	306000	369000	366000	365000	388000	328000	373000	1.14	0.52
BCL0423	Lipids-glycerophospholipid	2080000	2240000	2180000	2160000	2700000	2600000	2170000	2490000	1.15	0.51
BCL0195	Amino acid derivatives	308000	298000	442000	320000	255000	294000	349000	290000	0.83	0.51
BCL0418	unknown	1050000	1270000	981000	721000	1090000	981000	1100000	931000	0.85	0.51
BCL0213	Organic acid and its derivatives	2150000	1440000	1430000	1190000	1530000	1420000	1670000	1380000	0.83	0.51
BCL0429	unknown	12300	18300	13900	15200	16700	20800	14800	17600	1.18	0.5
BCL0240	Others	75200	91700	101000	97100	106000	103000	89300	102000	1.14	0.5
BCL0260	Catechin derivatives	73700	23500	17100	10600	41900	25300	38100	25900	0.68	0.5
BCL0205	Amino acids	631000	488000	423000	469000	741000	654000	514000	621000	1.21	0.5
BCL0217	Others	21200	18900	16700	17600	26900	23200	18900	22600	1.19	0.49
BCL0124	Others	371000	215000	338000	227000	264000	262000	308000	251000	0.82	0.49
BCL0303	Phenylpropanoids	14300	21100	12500	8460	16800	13900	16000	13100	0.82	0.49
BCL0269	Phenylpropanoids	21400	4610	8010	9110	4820	7550	11300	7160	0.63	0.49
BCL0288	Flavonol	28000	8410	1950	6260	17500	12700	12800	12200	0.95	0.48
BCL0484	unknown	3350	4210	2940	3490	4530	4180	3500	4070	1.16	0.48
BCL0376	Lipids-fatty acid	65800	58000	51600	45300	55300	52600	58500	51100	0.87	0.48
BCL0200	Others	120000	147000	118000	138000	149000	146000	128000	144000	1.12	0.47
BCL0020	Amino acid derivatives	28300	38200	30500	40800	13100	31200	32300	28400	0.88	0.47
BCL0037	Others	14300	22900	20700	27100	18100	23200	19300	22800	1.18	0.46
BCL0285	Flavonol	65700	17800	6960	8290	70000	42100	30200	40100	1.33	0.46
BCL0417	Terpenoids	2910	2590	7750	9140	2270	6620	4420	6010	1.36	0.46
BCL0112	Nucleotide and its derivates	1320000	1490000	1340000	1880000	1250000	1720000	1380000	1620000	1.17	0.45
BCL0381	unknown	97900	61700	73500	56100	72800	68300	77700	65700	0.85	0.45
BCL0419	Lipids-glycerophospholipid	5980000	6450000	5950000	4410000	6120000	5760000	6130000	5430000	0.89	0.44
BCL0453	unknown	56400	44000	50100	34700	52100	44600	50200	43800	0.87	0.44
BCL0272	Others	527000	139000	236000	199000	193000	222000	301000	205000	0.68	0.44
BCL0309	Others	10700	14200	12800	11000	10600	11600	12600	11100	0.88	0.44
BCL0436	unknown	174000	253000	277000	148000	236000	211000	235000	198000	0.84	0.44
BCL0053	Amino acids	492000	332000	362000	360000	312000	350000	395000	341000	0.86	0.43
BCL0119	Amino acid derivatives	327000	151000	129000	120000	182000	157000	202000	153000	0.76	0.43
BCL0361	Others	578000	464000	408000	375000	442000	446000	483000	421000	0.87	0.43
BCL0328	Flavone	15700	12500	13000	7160	16200	12800	13700	12100	0.88	0.43
BCL0286	Catechin derivatives	96200	32400	25500	35100	77000	61600	51400	57900	1.13	0.42
BCL0446	Lipids-glycerophospholipid	313000	467000	408000	351000	551000	492000	396000	465000	1.17	0.42
BCL0069	Organic acid and its derivatives	189000	141000	125000	131000	128000	134000	152000	131000	0.86	0.42
BCL0346	Phenylpropanoids	17500	18300	11700	19600	16000	18300	15800	18000	1.13	0.42
BCL0143	Others	103000	108000	107000	135000	100000	124000	106000	120000	1.13	0.42
BCL0377	Lipids-fatty acid	87100	68400	56100	60300	60000	62700	70500	61000	0.86	0.41
BCL0472	Others	18700	9040	13400	7820	14500	12200	13700	11500	0.84	0.38
BCL0077	Amino acids	38900000	20900000	19000000	20900000	20500000	22900000	26300000	21400000	0.82	0.37
BCL0137	unknown	56600	39900	39000	55600	43300	52300	45200	50400	1.12	0.37
BCL0160	Others	484000	384000	282000	302000	346000	344000	383000	331000	0.86	0.36
BCL0493	Phytohormones	33100	30500	28400	22900	32000	28700	30700	27900	0.91	0.36
BCL0084	Amino acids	24500000	26800000	21700000	21100000	23200000	22600000	24300000	22300000	0.92	0.36
BCL0363	unknown	12300000	5940000	5320000	4050000	9000000	6290000	7850000	6450000	0.82	0.36
BCL0319	Flavone	4940	5490	10700	5480	5840	5860	7040	5730	0.81	0.35
BCL0425	unknown	6490	9040	7450	9930	6150	10500	7660	8860	1.16	0.35
BCL0431	unknown	900000	1240000	893000	730000	1010000	952000	1010000	897000	0.89	0.35
BCL0250	Vitamine related	5660000	5950000	6490000	5530000	7570000	6960000	6030000	6690000	1.11	0.35
BCL0010	Vitamine related	203000	215000	267000	261000	230000	257000	228000	249000	1.09	0.35
BCL0452	unknown	71200	66700	60800	73600	66200	74300	66200	71400	1.08	0.35
BCL0044	Nucleotide and its derivates	827000	722000	724000	1410000	481000	1010000	758000	966000	1.27	0.34
BCL0062	Nucleotide and its derivates	137000	59300	66700	44500	105000	70900	87700	73500	0.84	0.33
BCL0107	Amino acids	9130000	6950000	6130000	5190000	7810000	6780000	7400000	6590000	0.89	0.33
BCL0483	unknown	269000	356000	253000	257000	254000	281000	293000	264000	0.9	0.33
BCL0210	Others	3610	8070	5350	4720	7730	6610	5680	6350	1.12	0.33
BCL0166	Vitamine related	2670	1240	4930	1290	3310	2340	2950	2310	0.79	0.33
BCL0334	Others	3740	5460	6330	4700	4220	4650	5180	4520	0.87	0.33
BCL0012	Others	7600000	5930000	5970000	7080000	6690000	7310000	6500000	7030000	1.08	0.33
BCL0447	Others	66300	50300	59700	53200	75100	66800	58800	65000	1.11	0.32
BCL0051	Vitamine related	18600	26000	25000	25200	15500	22100	23200	20900	0.9	0.32
BCL0413	unknown	25800	27100	22500	50000	15300	31400	25100	32200	1.28	0.32
BCL0216	Indoles and its derivatives	166000	196000	220000	190000	223000	218000	194000	210000	1.08	0.32
BCL0343	unknown	59700	43100	59200	39400	55900	51100	54000	48800	0.9	0.31
BCL0284	Flavone	27400	4840	3180	4450	16500	11400	11800	10800	0.91	0.31
BCL0262	Phenylpropanoids	276000	169000	66100	143000	196000	183000	170000	174000	1.02	0.31
BCL0151	unknown	18800000	19000000	16200000	16100000	16900000	17400000	18000000	16800000	0.93	0.31
BCL0152	Amino acids	44600000	39800000	39800000	40600000	47100000	45100000	41400000	44300000	1.07	0.31
BCL0393	unknown	9930	13800	7220	15600	4370	9630	10300	9870	0.96	0.31
BCL0454	unknown	41400	30400	23400	27900	25400	30200	31700	27800	0.88	0.31
BCL0420	unknown	131000	132000	133000	104000	138000	128000	132000	123000	0.93	0.3
BCL0450	unknown	65500	52000	45500	43400	53400	51000	54300	49300	0.91	0.3
BCL0155	Nucleotide and its derivates	33200	36600	6500	38200	6100	23100	25400	22500	0.88	0.3
BCL0215	Others	10400	7430	8330	8580	10000	9630	8720	9400	1.08	0.29
BCL0098	Vitamine related	211000	294000	245000	145000	309000	238000	250000	231000	0.92	0.29
BCL0351	unknown	110000	128000	113000	110000	133000	135000	117000	126000	1.08	0.29
BCL0150	Amino acid derivatives	74700	49700	61700	48500	61700	58800	62000	56300	0.91	0.28
BCL0405	unknown	107000	108000	110000	108000	112000	122000	108000	114000	1.05	0.28
BCL0416	Terpenoids	5310	4060	7940	12300	2590	8630	5770	7840	1.36	0.28
BCL0030	Alkaloids	1070000	1550000	929000	962000	1650000	1340000	1180000	1320000	1.11	0.27
BCL0173	Vitamine related	2360000	2560000	2320000	2430000	2130000	2320000	2410000	2290000	0.95	0.27
BCL0455	unknown	138000	173000	65200	98400	102000	112000	125000	104000	0.83	0.26
BCL0428	Others2	8290	12400	8730	6680	10700	9480	9810	8950	0.91	0.25
BCL0056	Others	84800	48300	74400	104000	51200	79300	69200	78200	1.13	0.25
BCL0005	Others	37000000	28700000	34000000	31100000	29800000	32400000	33200000	31100000	0.94	0.25
BCL0289	Flavone	682000	478000	590000	834000	460000	659000	583000	651000	1.12	0.25
BCL0356	Organic acid and its derivatives	41800	24800	38700	22400	40700	33500	35100	32200	0.92	0.25
BCL0034	Amino acids	26600000	32700000	20000000	26300000	29100000	28700000	26400000	28000000	1.06	0.25
BCL0007	Amino acid derivatives	335000	273000	322000	332000	309000	339000	310000	327000	1.05	0.24
BCL0352	Others	106000	91000	125000	102000	117000	123000	107000	114000	1.06	0.24
BCL0188	Phenolamides	50200	100000	44500	109000	34000	77600	64900	73500	1.13	0.23
BCL0433	Lipids-fatty acid	110000	126000	73600	97500	101000	132000	103000	110000	1.07	0.23
BCL0422	unknown	4430	7170	6440	5860	6530	6730	6010	6370	1.06	0.23
BCL0015	Organic acid and its derivatives	22700000	25400000	28600000	24000000	23300000	25200000	25600000	24200000	0.94	0.23
BCL0130	Nucleotide and its derivates	899000	1210000	1010000	1480000	547000	1050000	1040000	1030000	0.99	0.23
BCL0481	Lipids-glycerides	4930	5800	5200	4170	5730	5180	5310	5030	0.95	0.22
BCL0353	Others	38100	26000	45000	35400	37800	41500	36400	38200	1.05	0.22
BCL0204	Amino acid derivatives	18000	16600	18500	13800	23800	20700	17700	19400	1.1	0.22
BCL0094	Nucleotide and its derivates	172000	370000	162000	218000	177000	208000	235000	201000	0.86	0.22
BCL0270	Flavonoids	1400	6810	4670	2720	5560	4320	4290	4200	0.98	0.22
BCL0141	Vitamine related	2090000	2490000	2680000	2910000	1620000	2390000	2420000	2310000	0.95	0.21
BCL0415	Vitamine related	2770	4060	927	2090	2530	2690	2590	2440	0.94	0.21
BCL0140	Nucleotide and its derivates	90200	59500	62600	77400	52400	67400	70800	65700	0.93	0.2
BCL0278	Alkaloids	65600	48000	33000	33400	54100	44600	48900	44000	0.9	0.2
BCL0378	unknown	10400	12600	11200	10700	10400	11600	11400	10900	0.96	0.2
BCL0033	Amino acids	54600000	49100000	61100000	53300000	48600000	54900000	54900000	52300000	0.95	0.2
BCL0081	Organic acid and its derivatives	13100000	11100000	9170000	9420000	11100000	10700000	11100000	10400000	0.94	0.2
BCL0300	Flavone	146000	411000	289000	272000	278000	303000	282000	284000	1.01	0.2
BCL0358	unknown	2430000	2200000	2890000	2420000	2650000	2790000	2510000	2620000	1.04	0.2
BCL0302	Alkaloids	5650	3990	5080	3250	5390	5330	4910	4660	0.95	0.2
BCL0156	Phenylpropanoids	1230000	928000	875000	956000	1130000	1100000	1010000	1060000	1.05	0.2
BCL0024	Amino acid derivatives	27800	22600	18100	18300	22300	23100	22800	21200	0.93	0.2
BCL0045	Flavonoids	12200000	17500000	10500000	13600000	10800000	12900000	13400000	12400000	0.93	0.19
BCL0061	Amino acid derivatives	625000	286000	217000	281000	332000	318000	376000	310000	0.83	0.19
BCL0403	Others	198000	196000	213000	182000	196000	209000	202000	196000	0.97	0.18
BCL0209	Catechin derivatives	122000	60100	21800	12200	193000	101000	68000	102000	1.5	0.18
BCL0411	Lipids-glycerophospholipid	66400	67700	56100	56000	62400	63800	63400	60700	0.96	0.18
BCL0113	Nucleotide and its derivates	25900000	27900000	23700000	33200000	21400000	27800000	25800000	27500000	1.06	0.18
BCL0176	Terpenoids	13800	13400	10400	19800	7410	15300	12500	14200	1.13	0.18
BCL0008	Nucleotide and its derivates	82600	70800	120000	94400	71200	86400	91100	84000	0.92	0.18
BCL0374	Others	17800	20200	19100	22200	17000	20600	19000	19900	1.05	0.18
BCL0232	Others	14000	17900	15600	13400	16300	15600	15800	15100	0.95	0.18
BCL0211	Amino acid derivatives	3750000	3450000	3430000	2850000	3890000	3510000	3540000	3420000	0.96	0.18
BCL0001	Phenolamides	4340000	2830000	3640000	3180000	3410000	3530000	3600000	3370000	0.94	0.17
BCL0299	Organic acid and its derivatives	112000	88500	121000	94400	104000	107000	107000	102000	0.95	0.17
BCL0003	Carbohydrates	25200000	19700000	20300000	20400000	20100000	21700000	21700000	20700000	0.95	0.17
BCL0135	unknown	342000	219000	127000	329000	139000	242000	229000	237000	1.03	0.17
BCL0283	Alkaloids	13600	8670	8520	8730	12400	11100	10300	10700	1.05	0.17
BCL0105	Flavone	6340	13600	12600	11100	8120	9800	10800	9670	0.89	0.17
BCL0180	Phytohormones	52200	26800	32900	27400	48900	41200	37300	39200	1.05	0.16
BCL0086	Amino acids	1690000	1850000	2390000	2060000	1660000	1900000	1980000	1870000	0.95	0.16
BCL0494	Phenylpropanoids	186000	168000	103000	165000	143000	158000	152000	155000	1.02	0.16
BCL0439	Terpenoids	2960	3950	3240	5860	1650	4200	3380	3900	1.15	0.16
BCL0245	Others	70300	27700	28800	24700	48700	37500	42300	37000	0.87	0.16
BCL0115	Others	7280	9820	10900	9790	7710	8930	9330	8810	0.94	0.16
BCL0002	Phenolamides	10200000	7480000	8980000	9880000	8190000	9620000	8890000	9230000	1.04	0.15
BCL0009	Carbohydrates	455000	376000	437000	444000	353000	425000	423000	407000	0.96	0.15
BCL0129	Tryptamines and its derivatives	3400000	4760000	4060000	5940000	2300000	4270000	4070000	4170000	1.02	0.15
BCL0004	Nucleotide and its derivates	23500	24700	21600	26900	17300	24300	23300	22800	0.98	0.15
BCL0427	Nucleotide and its derivates	5770	3300	5930	4210	4870	4800	5000	4630	0.93	0.15
BCL0312	Others	185000	115000	191000	162000	165000	174000	164000	167000	1.02	0.14
BCL0016	Coumarins and its derivatives	68900	148000	51400	49500	72900	120000	89400	80800	0.9	0.14
BCL0006	Amino acid derivatives	19400	18000	18700	17600	18800	21600	18700	19300	1.03	0.14
BCL0246	Organic acid and its derivatives	8360	6190	8180	5890	9870	8050	7580	7940	1.05	0.14
BCL0340	Alkaloids	669000	551000	607000	500000	654000	619000	609000	591000	0.97	0.14
BCL0360	Others	48100	30100	46500	31100	52600	44900	41600	42900	1.03	0.13
BCL0470	unknown	41300	49800	32900	46500	35900	43400	41300	41900	1.01	0.12
BCL0243	Alkaloids	113000	136000	185000	91900	209000	153000	145000	151000	1.05	0.12
BCL0011	Others	60800	43700	63500	62000	51600	58900	56000	57500	1.03	0.12
BCL0258	Others	256000	224000	368000	385000	205000	307000	283000	299000	1.06	0.12
BCL0491	Phytohormones	10000	48200	19600	21600	21800	23800	25900	22400	0.86	0.12
BCL0490	Phytohormones	158000	200000	239000	184000	188000	198000	199000	190000	0.95	0.12
BCL0492	Phytohormones	3280	6160	3360	4130	4240	4340	4270	4240	0.99	0.12
BCL0042	Alkaloids	276000	283000	173000	247000	234000	255000	244000	245000	1.01	0.12
BCL0324	Others	37600	29600	21500	25500	29600	28200	29600	27800	0.94	0.12
BCL0337	Organic acid and its derivatives	45700	12200	24500	21400	21900	24800	27500	22700	0.83	0.11
BCL0412	Terpenoids	948000	1070000	1630000	1040000	1350000	1270000	1220000	1220000	1	0.11
BCL0468	unknown	693000	588000	551000	812000	423000	669000	611000	635000	1.04	0.11
BCL0359	Others	69200	54300	83800	72100	64200	74500	69100	70300	1.02	0.1
BCL0370	unknown	177000	141000	141000	164000	140000	165000	153000	156000	1.02	0.1
BCL0389	unknown	995000	779000	768000	680000	1060000	894000	847000	878000	1.04	0.1
BCL0022	Amino acids	450000	721000	481000	407000	642000	537000	551000	529000	0.96	0.1
BCL0237	Others	1430000	424000	314000	205000	1270000	788000	723000	754000	1.04	0.1
BCL0174	Nucleotide and its derivates	128000	233000	124000	111000	188000	157000	162000	152000	0.94	0.09
BCL0291	Flavone	14100	14000	12500	8260	20700	14900	13500	14600	1.08	0.09
BCL0039	Amino acids	73800	56000	52400	73200	45800	62700	60700	60600	1	0.09
BCL0382	unknown	148000	134000	162000	120000	168000	155000	148000	148000	1	0.09
BCL0264	Flavone	6120	4270	12300	8100	5740	7590	7560	7140	0.94	0.08
BCL0025	Organic acid and its derivatives	17300000	9630000	15500000	17300000	11000000	15000000	14100000	14400000	1.02	0.08
BCL0158	Nucleotide and its derivates	7520000	5380000	5220000	5850000	6100000	6320000	6040000	6090000	1.01	0.08
BCL0344	unknown	34100	20100	25800	30500	21900	28400	26700	26900	1.01	0.07
BCL0320	Flavonol	80300	42100	46200	52000	48600	57500	56200	52700	0.94	0.06
BCL0013	Others	80000000	70900000	78400000	78500000	72600000	80900000	76400000	77300000	1.01	0.06
BCL0082	Amino acids	3270000	1910000	2220000	2390000	2250000	2420000	2470000	2350000	0.95	0.06
BCL0385	Others	1010000	730000	795000	679000	996000	867000	845000	847000	1	0.06
BCL0103	Nucleotide and its derivates	82400	120000	107000	112000	87300	110000	103000	103000	1	0.06
BCL0287	Catechin derivatives	86100	37200	28400	27700	67100	52100	50600	49000	0.97	0.06
BCL0028	Cholines	4690000	2730000	4260000	4920000	2870000	4100000	3890000	3960000	1.02	0.06
BCL0055	Amino acid derivatives	353000	163000	236000	298000	178000	269000	251000	248000	0.99	0.05
BCL0367	Phytohormones	47000	57300	29100	24500	68300	49600	44500	47500	1.07	0.05
BCL0462	unknown	1350000	805000	732000	683000	1220000	971000	962000	958000	1	0.05
BCL0014	Vitamine related	71000	79000	98500	77800	84100	84700	82800	82200	0.99	0.05
BCL0251	Vitamine related	7430000	7700000	6980000	6580000	7980000	7400000	7370000	7320000	0.99	0.05
BCL0395	Flavone	30800	17200	16200	22300	17900	21400	21400	20500	0.96	0.05
BCL0054	Amino acids	1060000	649000	679000	820000	680000	826000	796000	775000	0.97	0.04
BCL0060	Amino acids	12300000	12500000	9390000	9670000	12600000	11600000	11400000	11300000	0.99	0.03
BCL0471	unknown	9220	13000	13700	12500	10700	12400	12000	11900	0.99	0.02
BCL0461	unknown	3150	1990	1750	2110	2280	2240	2300	2210	0.96	0.02
BCL0078	Amino acids	1260000	791000	818000	922000	925000	940000	956000	929000	0.97	0.02
BCL0365	unknown	78600	57000	114000	94400	62300	86000	83200	80900	0.97	0.02
BCL0259	Alkaloids	5860000	1060000	2340000	2760000	1810000	2830000	3090000	2470000	0.8	0.02
BCL0247	Phenylpropanoids	84300	90500	210000	155000	82300	126000	128000	121000	0.94	0.01
