# Supplementary material for: Overexpression of BraLTP2, a Lipid Transfer Protein of Brassica napus, Results in Increased Trichome Density and Altered Concentration of Secondary Metabolites
Source: Int J Mol Sci. 2018 Jun 12;19(6):1733. doi: 10.3390/ijms19061733 (PMC6032385; doi:10.3390/ijms19061733)
Supplement: Supplementary file 1 [file ijms-19-01733-s001.zip › Supplemental Table 3-.xlsx]

## Sheet: Sheet1
Supplemental Table 3- The 89 differential metabolites have detected in WT and 35S::BraLTP2-3 plants leaves by LC-MS/MS.
Index	Compounds	Class	WT1	WT2	WT3	35S::BraLTP2-3 rep 1	35S::BraLTP2-3 rep 2	35S::BraLTP2-3 rep 3	WT G	35S::BraLTP2-3 G	fold change	VIP
BCL0099	L-Theanine	Amino acids	899000	493000	482000	108000	474000	307230	624667	296410	0.474509	1.29403
BCL0027	L-Histidine	Amino acids	9380000	3660000	6260000	3250000	2600000	3.081e+06	6.43333e+06	2977000	0.462746	1.25623
BCL0026	L-Arginine	Amino acids	40600000	15700000	20400000	6190000	12500000	9741530	2.55667e+07	9.47718e+06	0.370685	1.4815
BCL0019	Ornithine	Amino acids	539000	73900	149000	49400	20400	36863	253967	35554.3	0.139996	1.96919
BCL0171	3-(2-Naphthyl)-D-alanine	Amino acid derivatives	39500	20000	19100	58600	97100	83927.2	26200	79875.7	3.04869	1.72509
BCL0035	Aspartic acid O-rutinoside	Amino acid derivatives	727000	1220000	590000	807000	2800000	1851030	845667	1.81934e+06	2.15137	1.12227
BCL0304	Ferulic acid	Phenylpropanoids	2610	826	4360	13200	16000	15415.5	2598.67	14871.8	5.72288	2.23545
BCL0184	Brevifolincarboxylic acid	Phenylpropanoids	15400	23000	9900	69200	85100	83872	16100	79390.7	4.9311	2.12738
BCL0364	Geranyl acetate	Phenylpropanoids	20900	17300	17500	73100	74000	77292.8	18566.7	74797.6	4.0286	1.9981
BCL0315	trans-Cinnamaldehyde	Phenylpropanoids	3770	5090	4840	14400	7710	11283.8	4566.67	11131.3	2.4375	1.50133
BCL0266	Syringic acid	Phenylpropanoids	594	3150	2270	4290	5370	4996.6	2004.67	4885.53	2.43708	1.51814
BCL0225	Coumarin	Phenylpropanoids	6540000	7590000	5410000	11900000	17500000	1.49787e+07	6.51333e+06	14792900	2.27117	1.48477
BCL0311	Phellodenol H	Phenylpropanoids	7010000	11500000	10800000	2600000	3740000	3308550	9770000	3.21618e+06	0.32919	1.72741
BCL0255	Sinapoyl O-hexoside	Phenylpropanoids	1680000	1550000	1820000	429000	521000	502425	1.68333e+06	484142	0.287609	1.88518
BCL0036	O-Phosphocholine	Cholines	11100	6170	11200	35500	28700	36560	9490	33586.7	3.53916	1.87913
BCL0029	sn-Glycero-3-phosphocholine	Cholines	652000	1350000	694000	1730000	2530000	2235100	898667	2.16503e+06	2.40916	1.52175
BCL0181	Caffeoylcholine	Cholines	52300	130000	175000	69300	46500	58916	119100	58238.7	0.48899	1.04816
BCL0228	Sinapoylcholine	Cholines	2520000	2510000	1390000	728000	684000	771820	2140000	727940	0.340159	1.67282
BCL0230	Catechin(C)	Catechin derivatives	44900	10800	9680	3200	15300	8439.72	21793.3	8979.91	0.412048	1.09784
BCL0212	N-feruloyl agmatine	Phenolamides	4220	7420	1880	294000	56500	184038	4506.67	178179	39.5368	3.13301
BCL0226	N-Sinapoyl agmatine	Phenolamides	4030	2750	1340	28000	9440	20034	2706.67	19158	7.07808	2.25937
BCL0189	N-Coumaroyl agmatine	Phenolamides	2000	4010	56.3	4250	11400	8417.37	2022.1	8022.46	3.96739	1.82217
BCL0229	N-Feruloyl spermidine	Phenolamides	122000	68600	74700	146000	221000	170789	88433.3	179263	2.0271	1.33823
BCL0221	N-p-coumaroyl-2-hydroxyputrescine	Phenolamides	9780	6610	3450	2300	3550	3011.09	6613.33	2953.7	0.446628	1.25378
BCL0199	N-p-Coumaroyl putrescine derivative	Phenolamides	5920	3960	11300	1490	4450	3274.2	7060	3071.4	0.435042	1.28485
BCL0280	N-feruloyl cadaverine	Phenolamides	101000	81800	118000	48400	37100	45290.7	100267	43596.9	0.43481	1.50411
BCL0178	N-p-coumaroyl putrescine	Phenolamides	79100	442000	425000	171000	70900	124869	315367	122256	0.387664	1.06942
BCL0223	Spermidine derivative	Phenolamides	46700	110000	22100	27700	17500	24048	59600	23082.7	0.387293	1.16922
BCL0197	N-p-Coumaroylspermidine derivative	Phenolamides	17100	30300	13400	5220	9840	8309.48	20266.7	7789.83	0.384366	1.49201
BCL0170	N-p-coumaroylputrescine iso1	Phenolamides	47500	122000	175000	55600	31600	44928	114833	44042.7	0.383536	1.3169
BCL0201	N-sinapoyl putrescine	Phenolamides	629000	990000	965000	270000	219000	258168	861333	249056	0.289152	1.84379
BCL0149	N-Caffeoylputrescine	Phenolamides	27100	62500	75300	13000	8810	11770.5	54966.7	11193.5	0.203642	1.9953
BCL0131	Thymine	Nucleotide and its derivates	39300	23300	22000	72200	70400	65540	28200	69380	2.46028	1.57863
BCL0244	N6-Benzyladenine	Nucleotide and its derivates	357000	330000	372000	126000	170000	150548	353000	148849	0.421669	1.56215
BCL0190	Cyanidin 3-O-glucoside	Anthocyanin	2320000	902000	1390000	7650000	4550000	6530720	1.53733e+06	6.24357e+06	4.0613	1.95657
BCL0242	Cyanidin	Anthocyanin	6100	5060	3440	15300	13200	15343.8	4866.67	14614.6	3.003	1.7552
BCL0191	Delphinidin O-hexoside	Anthocyanin	90700	42700	32200	206000	115000	172658	55200	164553	2.98103	1.68974
BCL0261	Rosinidin O-hexoside	Anthocyanin	5230	2260	2700	10600	6000	8878.8	3396.67	8492.93	2.50037	1.52237
BCL0317	Chrysoeriol O-hexoside	Flavone	2260	1870	1930	12600	7130	10271.7	2020	10000.6	4.95078	2.101
BCL0306	Luteolin 5-O-hexoside	Flavone	44700	36700	42900	204000	131000	175032	41433.3	170011	4.10323	1.98315
BCL0314	Apigenin 7-O-glucoside (Cosmosiin)	Flavone	3430	2280	2280	11800	6540	9695.7	2663.33	9345.23	3.50885	1.83592
BCL0267	Luteolin O-hexosyl-O-hexoside	Flavone	24000	18000	29100	92200	54100	76278.4	23700	74192.8	3.1305	1.7495
BCL0308	Apigenin 7-O-glucoside	Flavone	6960	4600	4500	13500	16800	15762.4	5353.33	15354.1	2.86814	1.71746
BCL0297	3',4',5'-Dihydrotricetin O-hexosyl-O-hexoside	Flavone	3630	3130	5160	13200	7870	10170	3973.33	10413.3	2.62081	1.59211
BCL0177	Luteolin-3',7-di-O-glucoside	Flavone	9960000	3810000	3360000	15100000	11200000	14443200	5710000	1.35811e+07	2.37847	1.51332
BCL0485	Kaempferol	Flavonol	4520	6780	19600	50500	58900	58362.8	10300	55920.9	5.42922	2.21795
BCL0305	Kaempferol 3-O-glucoside (Astragalin)	Flavonol	10700	27400	21900	147000	32500	96520.8	20000	92006.9	4.60035	1.81288
BCL0268	Quercetin O-hexoside	Flavonol	11000	11200	8030	35500	15400	26937	10076.7	25945.7	2.57483	1.49205
BCL0292	Kaempferol 3-O-β -rutinoside (Nicotiflorin)	Flavonol	13100	2090	903	2000	24700	14099.4	5364.33	13599.8	2.53523	1.20434
BCL0281	Kaempferide	Flavonoids	512	911	397	34000	28200	32207	606.667	31469	51.872	3.34974
BCL0318	Prunin	Flavonoids	1850	1640	307	4380	9600	7116.8	1265.67	7032.27	5.55618	2.10878
BCL0313	Naringenin 7-O-glucoside	Flavonoids	7590	5700	3650	14500	26800	21074	5646.67	20791.3	3.68205	1.86543
BCL0323	Naringenin O-malonylhexoside	Flavonoids	18600	20900	13500	52200	47400	51165	17666.7	50255	2.84462	1.71838
BCL0295	3,4,2',4',6'-Pentamethoxychalcone	Flavonoids	18500	16900	3910	19800	32100	26566.5	13103.3	26155.5	1.9961	1.27055
BCL0206	Na-Benzenolarginine ethylester	Others	699	1260	743	18900	3600	12057.6	900.667	11519.2	12.7896	2.49876
BCL0256	Bergamottin	Others	732000	702000	435000	2600000	3620000	3265830	623000	3.16194e+06	5.07535	2.14104
BCL0275	1-(3,4-dichlorophenyl)-3-methylurea	Others	219000	196000	153000	995000	731000	903720	189333	876573	4.62979	2.08208
BCL0410	2-Amino-9-methyl-4-octadecene-1,3,8-triol	Others	5920	4730	3760	10000	12200	11418	4803.33	11206	2.33296	1.53087
BCL0172	2,6-Xylidine	Others	6610000	6640000	6310000	3750000	2090000	3087600	6520000	2.97587e+06	0.456421	1.46666
BCL0354	Hinokitiol	Others	37600	60100	37100	17900	19700	20900	44933.3	19500	0.433976	1.46833
BCL0164	Dehydroabietylamine	Others	707000	3290000	2210000	882000	620000	805920	2069000	769307	0.371825	1.24156
BCL0198	2,2',2''-Nitrilotriethanol	Others	261000	422000	616000	69000	96100	84968	433000	83356	0.192508	2.0851
BCL0298	(6R,9R)-3-Oxo-alpha-ionyl-9-O-beta-glucopyranoside	Others	136000	82800	139000	23100	21900	23874	119267	22958	0.192493	2.13373
BCL0231	Esculin	Others2	108000	26300	44700	365000	204000	304880	59666.7	291293	4.88201	2.09945
BCL0282	N-hexosyl-p-coumaroyl serotonin	Tryptamines and its derivatives	506	2110	2060	156000	170000	168600	1558.67	164867	105.774	3.69285
BCL0293	5-Methoxy-N,N-dimethyltryptamine	Tryptamines and its derivatives	69900	26400	64600	203000	161000	191664	53633.3	185221	3.45347	1.84724
BCL0345	Caffeoyl serotonin	Tryptamines and its derivatives	20800	20600	17300	13200	5660	10084.2	19566.7	9648.07	0.493087	1.35079
BCL0049	Serotonin	Tryptamines and its derivatives	142000	43900	43200	21500	45800	34770	76366.7	34023.3	0.445526	1.0937
BCL0074	N-hydroxy tryptamine	Tryptamines and its derivatives	112000	50400	80000	30600	23300	29986	80800	27962	0.346064	1.61972
BCL0057	N-Benzoyltryptamine	Tryptamines and its derivatives	10900	7080	19000	1570	4050	3944	12326.7	3188	0.258626	1.81955
BCL0331	Isoquinoline	Alkaloids	32500	102000	21600	19000	14300	19904	52033.3	17734.7	0.340833	1.29439
BCL0326	4-Hydroxyquinoline	Alkaloids	1850000	4110000	1260000	843000	707000	832320	2.40667e+06	794107	0.329961	1.52133
BCL0219	Fructose 1,6-diphosphate	Carbohydrates	5510	14000	3350	118000	114000	123530	7620	118510	15.5525	2.83955
BCL0384	Phytocassane C	Terpenoids	3550	6080	10500	23100	7830	17098	6710	16009.3	2.38589	1.31967
BCL0167	DIMBOA glucoside	Terpenoids	86100	93900	72800	38900	42800	42785.6	84266.7	41495.2	0.492427	1.40316
BCL0238	Pyridoxine O-feruloyl hexoside	Vitamine related	6030	2060	5370	20200	50800	38482	4486.67	36494	8.13388	2.37924
BCL0252	(S)-(+)-2-(anilinomethyl)pyrrolidine	Vitamine related	13400	11200	9320	19400	29500	25670	11306.7	24856.7	2.19841	1.44228
BCL0162	Nicotinic acid-hexoside	Vitamine related	531000	2040000	2060000	619000	415000	557390	1.54367e+06	530463	0.343639	1.35725
BCL0335	4-Methylumbelliferone	Coumarins and its derivatives	15600	11900	17300	40800	28700	35802	14933.3	35100.7	2.35049	1.522
BCL0279	Scopoletin	Coumarins and its derivatives	3330	7280	16600	2970	1600	2505.6	9070	2358.53	0.260037	1.60152
BCL0273	IAA-Asp-N-Glc	Indoles and its derivatives	223	1450	550	45000	38300	43600	741	42300	57.085	3.3845
BCL0321	1-methoxyindole-3-carbaldehyde	Indoles and its derivatives	8250	3360	10700	19000	18000	18810	7436.67	18603.3	2.50157	1.56021
BCL0296	m-Anisic-acid	Organic acid and its derivatives	147000	96000	35700	155000	360000	273240	92900	262747	2.82827	1.57372
BCL0076	Phosphoric acid	Organic acid and its derivatives	538000	364000	276000	185000	167000	181500	392667	177833	0.452886	1.38764
BCL0387	LysoPC 16:2	Lipids-glycerophospholipid	53700	75800	46100	23300	34600	30731.4	58533.3	29543.8	0.504735	1.30078
BCL0463	LysoPC 18:0	Lipids-glycerophospholipid	230000	272000	302000	112000	144000	120862	268000	125621	0.468734	1.44526
BCL0486	Kinetin riboside	Phytohormones	4790	3640	2260	17200	3720	11920	3563.33	10946.7	3.07203	1.41066
BCL0489	Salicylic acid (SA)	Phytohormones	1450000	2260000	949000	2860000	5460000	4523220	1553000	4.28107e+06	2.75665	1.59818
BCL0182	trans-Zeatin (tZ)	Phytohormones	12200	9340	3360	4530	3550	4151.4	8300	4077.13	0.491221	0.99793
